# Supplementary material for: Mertk-expressing microglia influence oligodendrogenesis and myelin modelling in the CNS
Source: PubMed Central journal article supplement (PMC10626688; doi:10.1186/s12974-023-02921-8), 2023-11-06
Supplement: 12974_2023_2921_MOESM6_ESM.pdf [file 12974_2023_2921_MOESM6_ESM.pdf]

| Figure    | Panel | Main test                         | Main test statistics summary                                                                                                                                                                                                                                                                                                                                                                                                                                                     | Pre-planned multiple comparison test               | Multiple comparison test statistics summary              |
|-----------|-------|-----------------------------------|----------------------------------------------------------------------------------------------------------------------------------------------------------------------------------------------------------------------------------------------------------------------------------------------------------------------------------------------------------------------------------------------------------------------------------------------------------------------------------|----------------------------------------------------|----------------------------------------------------------|
| Figure S5 | B     | Student's t-test, unpaired, 2-way | P=0.2739 t=1.204 95% CI = -14.26 to 41.90                                                                                                                                                                                                                                                                                                                                                                                                                                        |                                                    |                                                          |
| Figure S5 | C     | Student's t-test, unpaired, 2-way | Fgf2: P=0.3702 t=2.923 95% CI = -0.2930 to 0.6770 Pdgfra: P=0.3837 t=0.9396 95% CI = -0.2970 to 0.6674 Lif: P=0.5402 t=0.6492 95% CI = -0.3045 to 0.5244 Gas6: P=0.3629 t=0.9844 95% CI = -0.3048 to 0.7150 Igf1: P=0.8232 t=0.2335 95% CI = -0.5555 to 0.4587. Lgals3: P=0.5456 t=0.6403 95% CI = -0.3382 to 0.5779 Spp1: P=0.3066 t=0.1.112 95% CI = -0.7084 to 0.2656 Pros1: P=0.8550 t=0.1908 95% CI = -0.4330 to 0.5063 Gpnmb: P=0.8437 t=0.2059 95% CI = -0.4766 to 0.5642 |                                                    |                                                          |
| Figure 2  | B     | Two way ANOVA                     | Interaction: F(2,15) = 0.5238 Age: (2, 15) = 39.41 Genotype: (F1, 15) = 0.002032                                                                                                                                                                                                                                                                                                                                                                                                 | WT-cKO P28                                         | P=0.4033; 95% CI = -115291 to 271256                     |
| Figure 2  | B     |                                   |                                                                                                                                                                                                                                                                                                                                                                                                                                                                                  | WT-cKO young adult                                 | P=0.7361; 95% CI = -224404 to 162143                     |
| Figure 2  | B     |                                   |                                                                                                                                                                                                                                                                                                                                                                                                                                                                                  | WT-cKO Aged                                        | P=0.6672; 95% CI = -233045 to 153502                     |
| Figure 2  | C     | Simple linear regression          | WT: P<0.0001, F=116, Y = 0.03821*X + 0.07445. cKO:P<0.0001, F=100.9, Y = 0.03533*X + 0.07847                                                                                                                                                                                                                                                                                                                                                                                     |                                                    |                                                          |
| Figure 2  | C     |                                   |                                                                                                                                                                                                                                                                                                                                                                                                                                                                                  | WT-cKO: Test for difference in slope and elevation | Slope: F=0.3333, P=0.5636; Elevation: F=2.537, P=0.1115  |
| Figure 2  | D     | Simple linear regression          | WT: P<0.0001, F=371.4, Y = 0.05857*X + 0.09789 cKO:P<0.0001, F=248.4, Y = 0.07190*X + 0.08962                                                                                                                                                                                                                                                                                                                                                                                    |                                                    |                                                          |
| Figure 2  | D     |                                   |                                                                                                                                                                                                                                                                                                                                                                                                                                                                                  | WT-cKO: Test for difference in slope and elevation | Slope: F=6.233, P=0.0126                                 |
| Figure 2  | E     | Simple linear regression          | WT: P=0.0005, F=12.26, Y = 0.01555*X + 0.08486 cKO:P<0.0001, F=103.6, Y = 0.03583*X + 0.06782                                                                                                                                                                                                                                                                                                                                                                                    |                                                    |                                                          |
| Figure 2  | E     |                                   |                                                                                                                                                                                                                                                                                                                                                                                                                                                                                  | WT-cKO: Test for difference in slope and elevation | Slope: F=12.70, P=0.0004                                 |
| Figure 2  | G     | Fisher's exact test (two-sided)   | P=0.0016                                                                                                                                                                                                                                                                                                                                                                                                                                                                         |                                                    |                                                          |
| Figure 2  | H     | Two way ANOVA                     | Interaction: F(1, 10) = 5.330 Postnatal day: (F1,10) = 1590 Genotype: (F1, 10) = 15.54                                                                                                                                                                                                                                                                                                                                                                                           | WT-cKO P7                                          | P=0.0013; 95% CI = 0.3200 to 0.9706                      |
| Figure 2  | H     |                                   |                                                                                                                                                                                                                                                                                                                                                                                                                                                                                  | WT-cKO P15                                         | P=0.2751; 95% CI = -0.1567 to 0.4938                     |
| Figure 2  | I     | Two way ANOVA                     | Interaction: F(1, 10) = 2.459 Postnatal day: (F1,10) = 1503 Genotype: (F1, 10) = 5.641                                                                                                                                                                                                                                                                                                                                                                                           | WT-cKO P7                                          | P=0.0192; 95% CI = 0.05428 to 0.4864                     |
| Figure 2  | I     |                                   |                                                                                                                                                                                                                                                                                                                                                                                                                                                                                  | WT-cKO P15                                         | P=0.5812; 95% CI = -0.1608 to 0.2714                     |
| Figure 6  | B     | Student's t-test, unpaired, 2-way | t=0.09813 95% CI = -30.45 to 28.21                                                                                                                                                                                                                                                                                                                                                                                                                                               |                                                    |                                                          |
| Figure 6  | C     | Student's t-test, unpaired, 2-way | t=0.5063 95% CI = -34.35 to 51.20                                                                                                                                                                                                                                                                                                                                                                                                                                                |                                                    |                                                          |
| Figure 6  | D     | Student's t-test, unpaired, 2-way | t=0.07467 95% CI = -259.9 to 275.4                                                                                                                                                                                                                                                                                                                                                                                                                                               |                                                    |                                                          |
| Figure 5  | C     | Two way ANOVA                     | Interaction: F(1, 11) = 1.042 Weeks cuprizone: (F1,11) = 0.2217 Genotype: (F1, 11) = 0.08844                                                                                                                                                                                                                                                                                                                                                                                     |                                                    |                                                          |
| Figure 5  | D     | Simple linear regression          | WT: P=0.0009, F=11.47, Y = 0.02429*X + 0.06186 cKO:P=0.0012, F=10.93, Y = 0.02901*X + 0.06037                                                                                                                                                                                                                                                                                                                                                                                    |                                                    |                                                          |
| Figure 5  | D     |                                   |                                                                                                                                                                                                                                                                                                                                                                                                                                                                                  | WT-cKO: Test for difference in slope and elevation | Slope: F=0.1802, P=0.6715; Elevation: F=0.1146, P=0.7352 |

|           |   |                                   |                                                                                                                               |                                                      |                                                                                       |
|-----------|---|-----------------------------------|-------------------------------------------------------------------------------------------------------------------------------|------------------------------------------------------|---------------------------------------------------------------------------------------|
| Figure 5  | E | Simple linear regression          | WT: $P < 0.0001$ , $F = 58.84$ , $Y = 0.06829 * X + 0.03939$<br>cKO: $P < 0.0001$ , $F = 22.01$ , $Y = 0.03657 * X + 0.05313$ | WT-cKO: Test for difference in slope and elevation   | Slope: $F = 6.854$ , $P = 0.0094$                                                     |
| Figure 6  | B | Two way ANOVA                     | Interaction: $F(1, 8) = 0.0157$<br>Weeks cuprizone: $(F1, 8) = 101$<br>Genotype: $(F1, 8) = 0.004667$                         | WT-cKO 3 weeks cuprizone<br>WT-cKO 5 weeks cuprizone | $P = 0.9688$ ; 95% CI = -1830 to 1895<br>$P = 0.8944$ ; 95% CI = -1973 to 1752        |
| Figure 6  | C | Two way ANOVA                     | Interaction: $F(1, 8) = 10.59$ Weeks cuprizone: $(F1, 8) = 345$ Genotype: $(F1, 8) = 5.353$                                   | WT-cKO 3 weeks cuprizone<br>WT-cKO 5 weeks cuprizone | $P = 0.5248$ ; 95% CI = -51.49 to 93.22<br>$P = 0.0043$ ; 95% CI = -195.9 to -51.18   |
| Figure 6  | D | Two way ANOVA                     | Interaction: $F(1, 8) = 0.02915$<br>Weeks cuprizone: $(F1, 8) = 5.7$<br>Genotype: $(F1, 8) = 0.4458$                          | WT-cKO 3 weeks cuprizone<br>WT-cKO 5 weeks cuprizone | $P = 0.7344$ ; 95% CI = -527.7 to 717.4<br>$P = 0.5696$ ; 95% CI = -462.5 to 782.6    |
| Figure 7  | B | Two way ANOVA                     | Interaction: $F(1, 10) = 0.6214$<br>Treatment: $(F1, 10) = 0.2465$<br>Genotype: $(F1, 10) = 368.6$                            | WT-cKO No treatment<br>WT-cKO rhGas6                 | $P < 0.0001$ ; 95% CI = 15.20 to 22.14<br>$P < 0.0001$ ; 95% CI = 13.73 to 20.66      |
| Figure 7  | C | Two way ANOVA                     | Interaction: $F(1, 10) = 0.4763$<br>Treatment: $(F1, 10) = 0.8766$<br>Genotype: $(F1, 10) = 8.733$                            | WT-cKO No treatment<br>WT-cKO rhGas6                 | $P = 0.2609$ ; 95% CI = -0.3412 to 1.408<br>$P = 0.0543$ ; 95% CI = -0.01621 to 1.733 |
| Figure 7  | D | Two way ANOVA                     | Interaction: $F(1, 10) = 0.4724$<br>Treatment: $(F1, 10) = 0.2204$<br>Genotype: $(F1, 10) = 28.94$                            | WT-cKO No treatment<br>WT-cKO rhGas6                 | $P = 0.0155$ ; 95% CI = 12137 to 104357<br>$P = 0.0032$ ; 95% CI = 29203 to 121423    |
| Figure 8  | C | Two way ANOVA                     | Interaction: $F(1, 12) = 0.3346$<br>Weeks recovery: $(F1, 12) = 0.7609$<br>Genotype: $(F1, 12) = 0.8944$                      |                                                      |                                                                                       |
| Figure 8  | D | Simple linear regression          | WT: $P = 0.0054$ , $F = 7.857$ , $Y = 0.01455 * X + 0.07936$<br>cKO: $P = 0.0006$ , $F = 12.10$ , $Y = 0.01786 * X + 0.07042$ | WT-cKO: Test for difference in slope and elevation   | Slope: $F = 0.2056$ , $P = 0.6504$ ; Elevation: $F = 12.96$ , $P = 0.0003$            |
| Figure 8  | E | Simple linear regression          | WT: $P < 0.0001$ , $F = 30.17$ , $Y = 0.02543 * X + 0.08612$<br>cKO: $P < 0.0001$ , $F = 17.82$ , $Y = 0.02133 * X + 0.08535$ | WT-cKO: Test for difference in slope and elevation   | Slope: $F = 0.3606$ , $P = 0.5484$ ; Elevation: $F = 2.307$ , $P = 0.1292$            |
| Figure S4 | B | Two way ANOVA                     | Interaction: $F(1, 12) = 0.6024$<br>Weeks recovery: $(F1, 12) = 16.13$<br>Genotype: $(F1, 12) = 3.780$                        | WT-cKO 2 weeks recovery<br>WT-cKO 4 weeks recovery   | $P = 0.0784$ ; 95% CI = -955.9 to 59.46<br>$P = 0.4249$ ; 95% CI = -700.1 to 315.2    |
| Figure S4 | C | Two way ANOVA                     | Interaction: $F(1, 12) = 0.1874$<br>Weeks recovery: $(F1, 12) = 2.844$<br>Genotype: $(F1, 12) = 3.370$                        |                                                      |                                                                                       |
| Figure S4 | D | Two way ANOVA                     | Interaction: $F(1, 12) = 1.186$<br>Weeks recovery: $(F1, 12) = 1.111$<br>Genotype: $(F1, 12) = 0.6467$                        |                                                      |                                                                                       |
| Figure 9  | C | Student's t-test, unpaired, 2-way | D10: $P = 0.0144$ $t = 2.694$ 95% CI = 0.8416 to 6.704<br>R3: $P = 0.0073$ $t = 3.005$ 95% CI = 1.985 to 11.10                |                                                      |                                                                                       |
| Figure 9  | E | Student's t-test, unpaired, 2-way | D10: $P = 0.9339$ $t = 0.08406$ 95% CI = -4.799 to 5.199<br>R3: $P = 0.0017$ $t = 3.675$ 95% CI = -7.073 to -1.927            |                                                      |                                                                                       |
